# Supplementary material for: CRISPR to fix bad blood: a new tool in basic and clinical hematology
Source: PubMed Central journal article supplement — Haematologica. 2019 Mar 28;104(5):881–93. doi: 10.3324/haematol.2018.211359 (PMC6518885; doi:10.3324/haematol.2018.211359), 2019-05
Supplement: 2018_211359-Disclosures_and_Contributions.pdf [file 2018_211359-Disclosures_and_Contributions.pdf]

Haematologica  
HAEMATOL/2018/211359  
Version 3

CRISPR to fix bad blood: a new tool in basic and clinical hematology

Elisa González-Romero, Cristina Martínez-Valiente, Cristian  
García-Ruiz, Rafael P. Vázquez-Manrique, José Cervera, and  
Alejandra Sanjuan-Pla

Disclosures: None

Contributions: EGR, CMV, CGR, RMV, JC and ASP performed data analysis. EGR, CMV, CGR and RMV participated in draft writing. ASP wrote the manuscript and supervised the study.
