# Supplementary material for: CRISPR to fix bad blood: a new tool in basic and clinical hematology
Source: PubMed Central journal article supplement — Haematologica. 2019 Mar 28;104(5):881–93. doi: 10.3324/haematol.2018.211359 (PMC6518885; doi:10.3324/haematol.2018.211359), 2019-05

# Applications of CRISPR/Cas9 technology in hematology research and human therapy

Experimental  
research

Human  
therapeutics

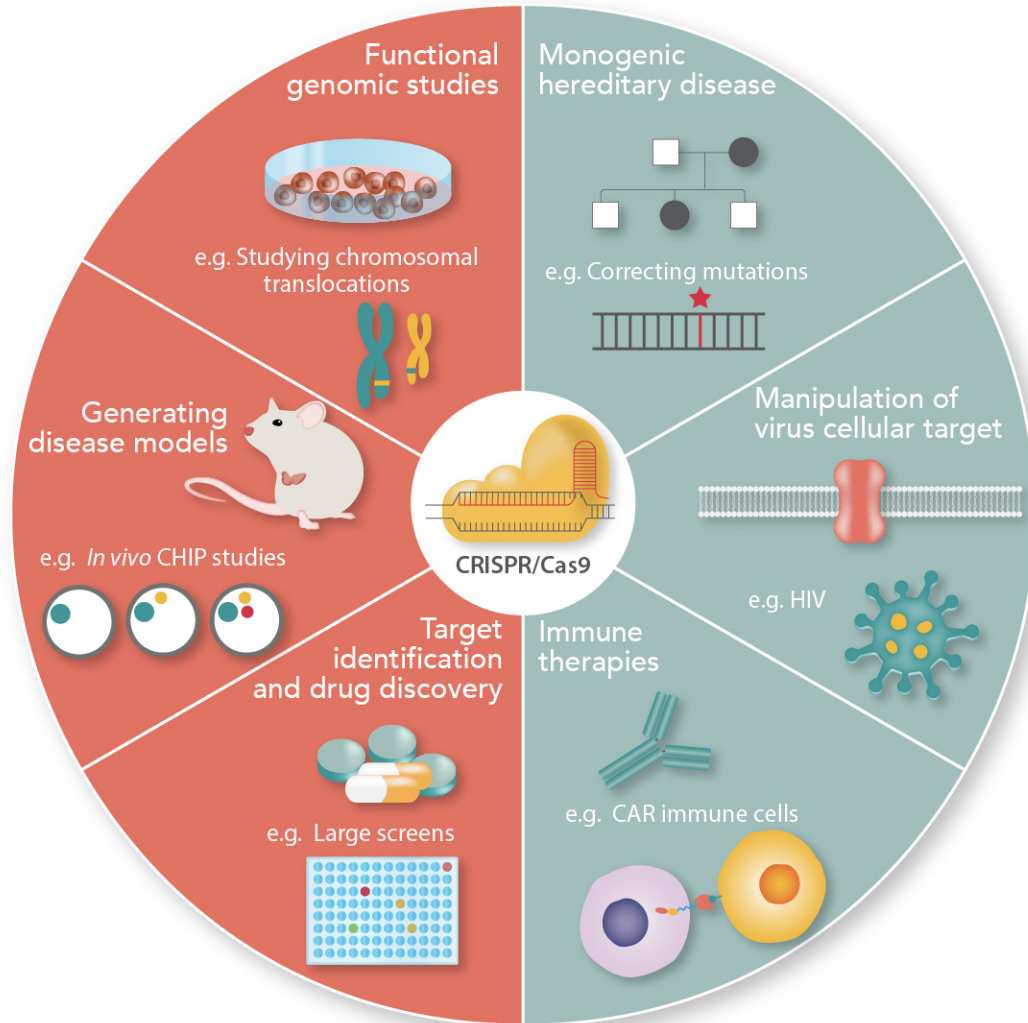

Supplement: HAEMATOL-2018-211359v3-Gonzalez-Romero-01.pdf [file HAEMATOL-2018-211359v3-Gonzalez-Romero-01.pdf]
